# Supplementary material for: ssDNA accessibility of Rad51 is regulated by orchestrating multiple RPA dynamics
Source: PubMed Central journal article supplement (PMC10313831; doi:10.1038/s41467-023-39579-y), 2023-06-30
Supplement: 41467_2023_39579_MOESM3_ESM.pdf [file 41467_2023_39579_MOESM3_ESM.pdf]

## **Description of Additional Supplementary Files**

### **File Name: Supplementary Data 1**

**Description:** Value list of length and intensity analysis of all three-step ssDNA Curtains experiments conducted in this work.

### **File Name: Supplementary Movie 1**

**Description: Three-step low-complexity ssDNA Curtains.** 10 pM RPA-MeGFP was flushed into the chamber for 30-min, and then 25-fold nM RPA-MeGFP (250 pM) was flushed into the chamber for another 10-min. The flow rate was 0.4 ml/min. The working buffer was 40 mM Tris-HCl (pH 7.5), 150 mM NaCl, 2 mM MgCl<sub>2</sub>, and 0.2 mg/mL BSA.
